# Supplementary material
Source: Springer Nature journal article supplement (https://www.springermedizin.de/resource/supplementary/12889_2008_1432_MOESM5_ESM.pdf/9503742)

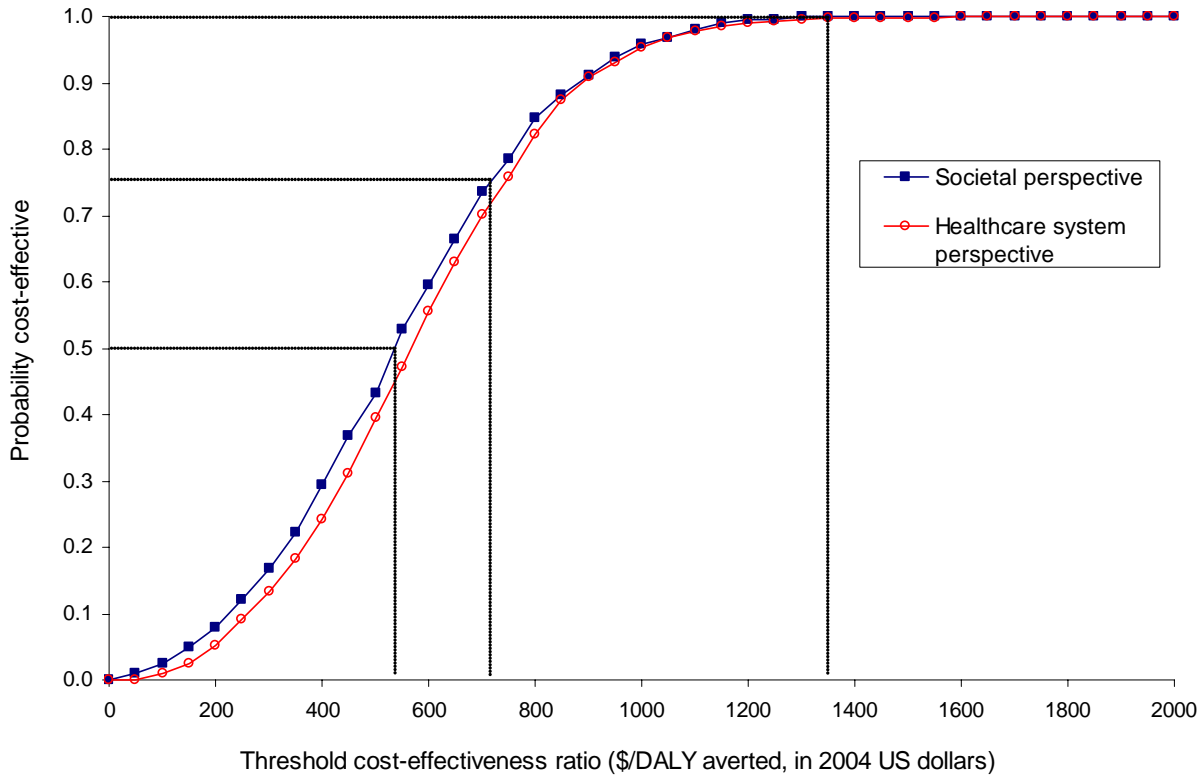

Supplement: MOESM5 [file 9503742]
